# Supplementary material for: Integrated Epigenomics Analysis Reveals a DNA Methylation Panel for Endometrial Cancer Detection Using Cervical Scrapings
Source: Oxford University Press journal article supplement (doi:10.1158/1078-0432.ccr-16-0863), 2016-08-09
Supplement: 10780432ccr160863-sup-164657_1_supp_3557871_4944v6.pdf [file 10780432ccr160863-sup-164657_1_supp_3557871_4944v6.pdf]

## **Supplementary Information**

Supplementary Figure S1. Test of the methylation status of candidate genes used pooled DNA from endometrial tissues and cervical scrapings.

Supplementary Figure S2. Verification of 14 candidate genes in the pilot set of cervical scrapings.

Supplementary Table S1: Demographics relating to the two data sets of genome-wide DNA methylation.

Supplementary Table S2. Demographics related to the clinical samples.

Supplementary Table S3: Summary the area under the receiver-operating characteristic curve for distinction between endometrial cancer and noncarcinoma samples in pilot testing.

Supplementary Table S4: Summary of cophenetic correlation results for analysis of consensus clustering of DNA methylation patterns.

Supplementary Table S5: List of 180 hypermethylated genes in four clusters.

Supplementary Table S6. Summary of the methylation levels of four candidate genes in cervical scrapings from endometrial cancer and noncarcinoma samples.

## DNA pools

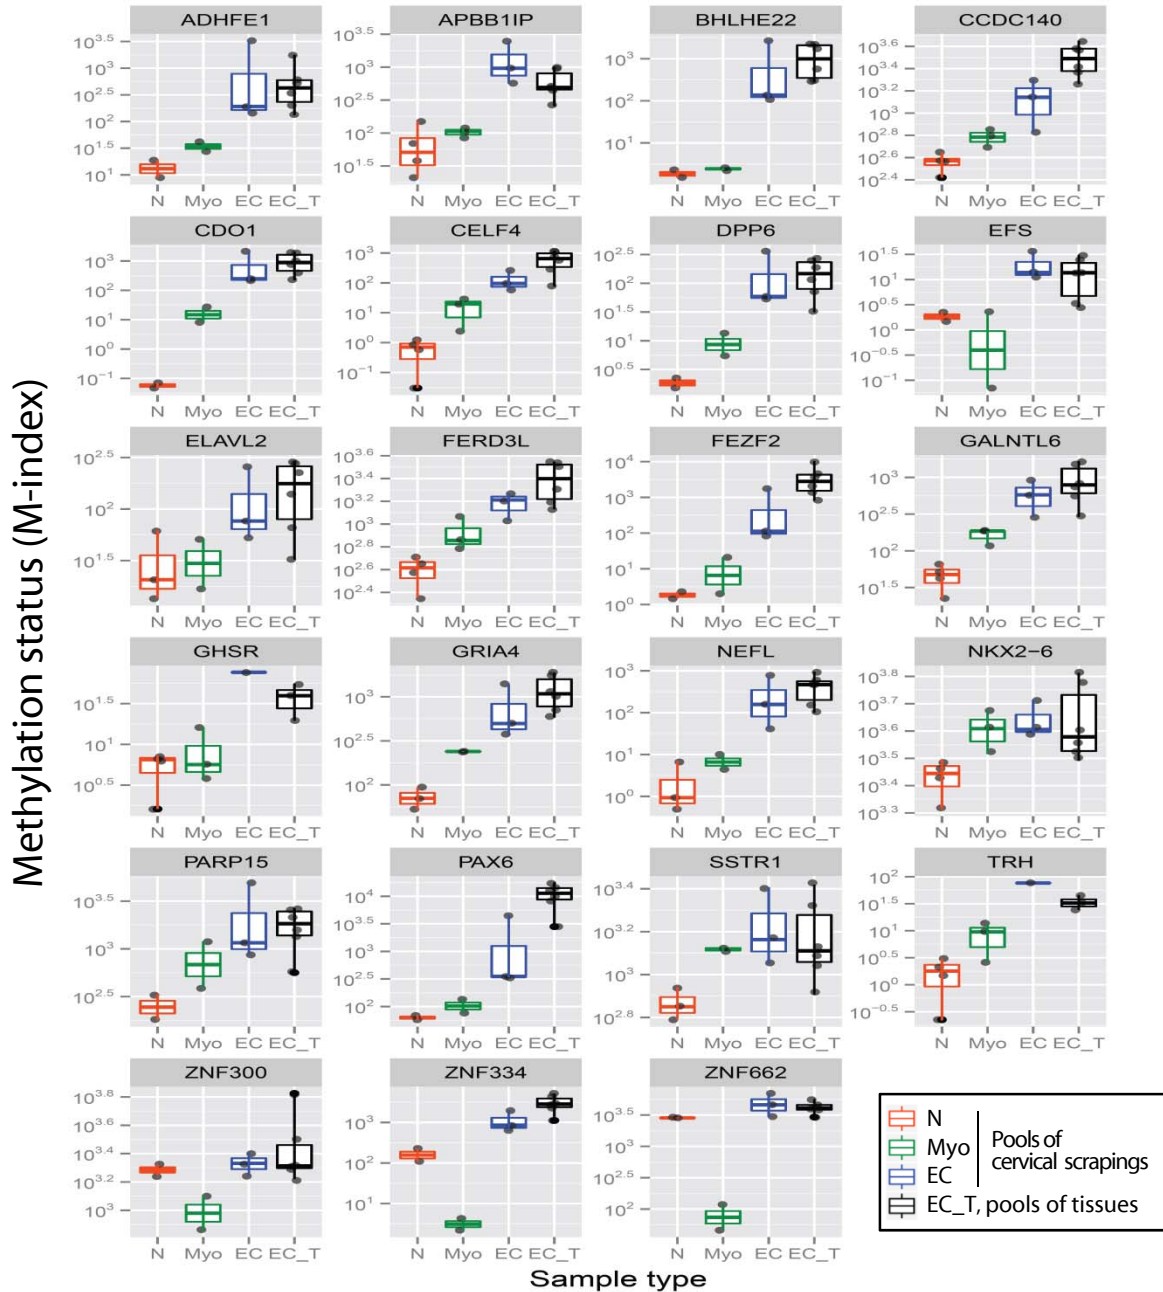

**Supplemental Figure S1. Test of the methylation status of candidate genes used pooled DNA from endometrial tissues and cervical scrapings.** Twenty-three candidate genes show hypermethylation in tissue and cervical scrapings from EC. Each spot is a pooled sample from 5 equal amounts DNA of tissue samples. We selected fourteen genes, *ADHFE1*, *APBB1IP*, *BHLHE22*, *CDO1*, *CELF4*, *DPP6*, *EFSFEZF2*, *GALNTL6*, *GRIA4*, *NEFL*, *PAX6*, *ZNF334*, and *ZNF662*, that demonstrated more specific higher DNA methylation in pooled cervical scrapings from endometrial cancer for further validation. N, normal; Myo, myoma, EC, endometrial cancer.

## Pilot set of individual cervical scrapings

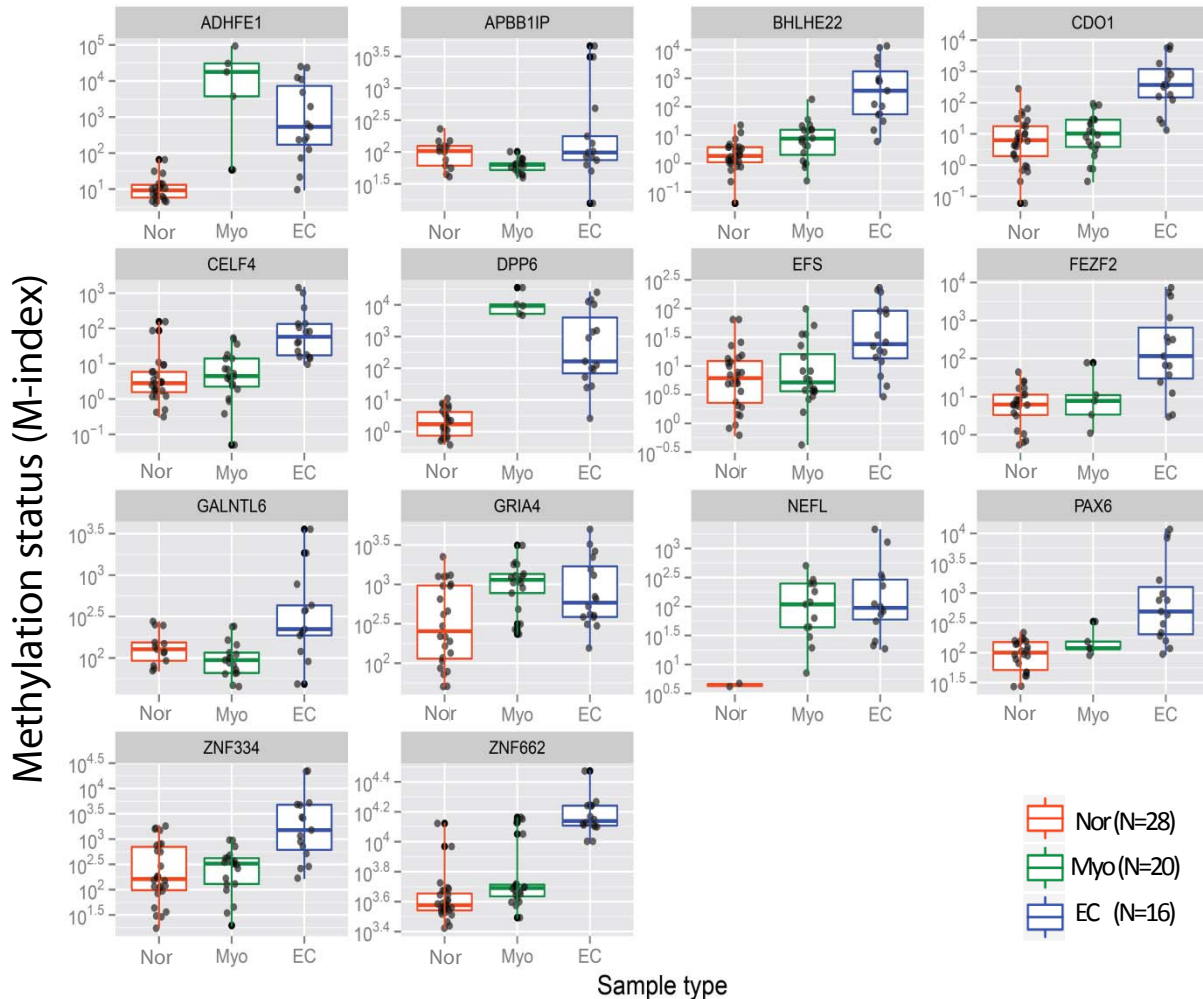

**Supplemental Figure S2. Verification of fourteen candidate genes in the pilot set of cervical scrapings.** We examined the DNA methylation in pilot set for reducing candidate genes. Nor, normal; Myo, myoma; EC, endometrial cancer; N, case number.

**Supplementary Table S1:** Demographics relating to the two data sets of genome-wide DNA methylation.

| Variable    | Set A (TCGA) |       |                 |       | Set B (MethylCap-seq) |       |                 |     |
|-------------|--------------|-------|-----------------|-------|-----------------------|-------|-----------------|-----|
|             | EC           | (%)   | Adjacent-normal | (%)   | EC                    | (%)   | Adjacent-normal | (%) |
| Case number | 270          |       | 28              |       | 78                    |       | 11              |     |
| Age(yrs)±SD | 62.1±11.7    |       | 58.6±10.0       |       | 64.6±10.2             |       |                 |     |
| 30 ~ 50 yrs | 34           | 12.6% | 5               | 17.9% | 3                     | 4.5%  |                 |     |
| > 50 yrs    | 236          | 87.4% | 23              | 82.1% | 64                    | 95.5% |                 |     |
| Stage       |              |       |                 |       |                       |       |                 |     |
| I           | 186          | 68.9% |                 |       | 50                    | 74.6% |                 |     |
| II          | 25           | 9.3%  |                 |       | 11                    | 16.4% |                 |     |
| III         | 50           | 18.5% |                 |       | 6                     | 9.0%  |                 |     |
| IV          | 9            | 3.3%  |                 |       | 0                     | 0.0%  |                 |     |
| Grade       |              |       |                 |       |                       |       |                 |     |
| 1           | 55           | 20.4% |                 |       | 32                    | 47.8% |                 |     |
| 2           | 76           | 28.1% |                 |       | 29                    | 43.3% |                 |     |
| 3           | 139          | 51.5% |                 |       | 6                     | 9.0%  |                 |     |

TCGA, The cancer genome atlas; MethylCap-seq, methyl-DNA binding domain capture coupled with next-generation sequencing; EC, endometrial cancer; SD, standard deviation.

**Supplementary Table S2.** Demographics related to the clinical samples.

| Variable                  | Tissue      | Cervical scrapings |
|---------------------------|-------------|--------------------|
| <b>Endometrial cancer</b> |             |                    |
| Case number               | 30          | 50                 |
| Age (yrs)±SD              | 52.4 ± 10.8 | 54.0 ± 8.4         |
| Stage                     |             |                    |
| I                         | 15          | 38                 |
| II                        | 1           | 3                  |
| III                       | 14          | 8                  |
| Unkown                    | 0           | 1                  |
| Grade                     |             |                    |
| G1                        | 4           | 20                 |
| G2                        | 17          | 13                 |
| G3                        | 7           | 4                  |
| Unkown                    | 2           | 13                 |
| <b>Myoma</b>              |             |                    |
| Case number               |             | 40                 |
| Age (yrs)±SD              |             | 44.1 ± 5.9         |
| Histology                 |             |                    |
| Adenomyosis               |             | 7                  |
| Leiomyoma                 |             | 18                 |
| Mix                       |             | 16                 |
| <b>Normal</b>             |             |                    |
| Case number               |             | 56                 |
| Age (yrs)±SD              |             | 49.0 ± 12.3        |

SD, standard deviation; Stage, the International Federation of Gynecology and Obstetrics (FIGO) stage

**Supplementary Table S3:** Summary the area under the receiver-operating characteristic curve for distinction between endometrial cancer and noncarcinoma samples in pilot testing.

| NO. | Gene Name | AUC (95% CI) |                |
|-----|-----------|--------------|----------------|
| 1   | BHLHE22   | 0.96         | (0.91 to 1.00) |
| 2   | ZNF662    | 0.96         | (0.91 to 1.00) |
| 3   | CDO1      | 0.95         | (0.89 to 1.00) |
| 4   | CELF4     | 0.92         | (0.86 to 0.99) |
| 5   | PAX6      | 0.87         | (0.74 to 1.00) |
| 6   | ZNF334    | 0.85         | (0.73 to 0.96) |
| 7   | FEZF2     | 0.84         | (0.68 to 1.00) |
| 8   | GALNTL6   | 0.80         | (0.63 to 0.97) |
| 9   | EFS       | 0.80         | (0.67 to 0.93) |
| 10  | DPP6      | 0.78         | (0.59 to 0.96) |
| 11  | ELAVL2    | 0.77         | (0.56 to 0.98) |
| 12  | APBB1IP   | 0.69         | (0.50 to 0.88) |
| 13  | NEFL      | 0.61         | (0.40 to 0.82) |
| 14  | GRIA4     | 0.40         | (0.23 to 0.57) |

Abbreviation: AUC, area under an receiver-operating curve. CI, confidence interval. The pilot set included 16, 20, and 28 cervical scrapings from patients with EC, myoma, and normal endometrium.

**Supplementary Table S4:** Summary of cophenetic correlation results for analysis of consensus clustering of DNA methylation patterns.

| Maximum iteration | Run multiple rank (number of cluster) |       |       |       |
|-------------------|---------------------------------------|-------|-------|-------|
|                   | 2                                     | 3     | 4     | 5     |
| 1000              | 0.860                                 | 0.834 | 0.564 | 0.797 |
| 1500              | 0.870                                 | 0.840 | 0.904 | 0.815 |
| 2000              | 0.846                                 | 0.871 | 0.902 | 0.569 |
| 2500              | 0.865                                 | 0.865 | 0.902 | 0.842 |
| 3000              | 0.874                                 | 0.902 | 0.912 | 0.867 |
| 3500              | 0.877                                 | 0.886 | 0.903 | 0.839 |
| 4000              | 0.877                                 | 0.909 | 0.922 | 0.881 |
| 4500              | 0.877                                 | 0.919 | 0.928 | 0.879 |
| 5000              | 0.877                                 | 0.587 | 0.932 | 0.893 |

The red boxes show the cophenetic correlation >0.92. The highest value means the best results for clustering.

**SupplementaryTable S5: List of 180 hypermethylated genes in four clusters.**

| NO. | RefSeq       | ENTREZ_ID | Gene Name | NMF cluster |
|-----|--------------|-----------|-----------|-------------|
| 1   | NM_001111270 | 115557    | ARHGEF25  | cluster c   |
| 2   | NM_001801    | 1036      | CDO1      | cluster c   |
| 3   | NM_001145135 | 1375      | CPT1B     | cluster c   |
| 4   | NM_183374    | 340665    | CYP26C1   | cluster c   |
| 5   | NM_007046    | 11117     | EMILIN1   | cluster c   |
| 6   | NM_001977    | 2028      | ENPEP     | cluster c   |
| 7   | NM_033266    | 10595     | ERN2      | cluster c   |
| 8   | NM_012306    | 23017     | FAIM2     | cluster c   |
| 9   | NM_004122    | 2693      | GHSR      | cluster c   |
| 10  | NM_012205    | 23498     | HAAO      | cluster c   |
| 11  | NM_022377    | 3386      | ICAM4     | cluster c   |
| 12  | NM_033267    | 153572    | IRX2      | cluster c   |
| 13  | NM_005545    | 3671      | ISLR      | cluster c   |
| 14  | NM_001024660 | 8997      | KALRN     | cluster c   |
| 15  | NM_001297433 | 10296     | MAEA      | cluster c   |
| 16  | NM_006211    | 5179      | PENK      | cluster c   |
| 17  | NM_001193341 | 221421    | RSPH9     | cluster c   |
| 18  | NM_001105204 | 23623     | RUSC1     | cluster c   |
| 19  | NM_020949    | 57709     | SLC7A14   | cluster c   |
| 20  | NM_012443    | 9576      | SPAG6     | cluster c   |
| 21  | NM_152380    | 6913      | TBX15     | cluster c   |
| 22  | NM_024600    | 79652     | TMEM204   | cluster c   |
| 23  | NM_007117    | 7200      | TRH       | cluster c   |
| 24  | NM_006634    | 10791     | VAMP5     | cluster c   |
| 25  | NM_001198552 | 7490      | WT1       | cluster c   |
| 26  | NM_144650    | 137872    | ADHFE1    | cluster d   |
| 27  | NM_170732    | 627       | BDNF      | cluster d   |
| 28  | NM_001082534 | 56934     | CA10      | cluster d   |
| 29  | NM_005181    | 761       | CA3       | cluster d   |
| 30  | NM_021827    | 60494     | CCDC81    | cluster d   |
| 31  | NM_033646    | 1005      | CDH7      | cluster d   |
| 32  | NM_001039936 | 1124      | CHN2      | cluster d   |
| 33  | NM_001029865 | 120237    | DBX1      | cluster d   |
| 34  | NM_004432    | 1993      | ELAVL2    | cluster d   |
| 35  | NM_001099439 | 284656    | EPHA10    | cluster d   |
| 36  | NM_152898    | 222894    | FERD3L    | cluster d   |
| 37  | NM_001127643 | 2554      | GABRA1    | cluster d   |
| 38  | NM_001127644 | 2554      | GABRA1    | cluster d   |
| 39  | NM_000829    | 2893      | GRIA4     | cluster d   |
| 40  | NM_001112812 | 2893      | GRIA4     | cluster d   |
| 41  | NM_001278067 | 2911      | GRM1      | cluster d   |
| 42  | NM_016815    | 2995      | GYPC      | cluster d   |
| 43  | NM_138610    | 9555      | H2AFY     | cluster d   |
| 44  | NM_021062    | 3018      | HIST1H2BB | cluster d   |
| 45  | NM_002500    | 4760      | NEUROD1   | cluster d   |
| 46  | NM_002511    | 4829      | NMBR      | cluster d   |
| 47  | NM_138735    | 9378      | NRXN1     | cluster d   |
| 48  | NM_001270524 | 5015      | OTX2      | cluster d   |
| 49  | NM_001113523 | 165631    | PARP15    | cluster d   |
| 50  | NM_018898    | 56135     | PCDHAC1   | cluster d   |



**SupplementaryTable S5: List of 180 hypermethylated genes in four clusters. (Con't)**

| NO. | RefSeq       | ENTREZ_ID | Gene Name | NMF cluster |
|-----|--------------|-----------|-----------|-------------|
| 51  | NM_032092    | 56105     | PCDHGA11  | cluster d   |
| 52  | NM_003735    | 26025     | PCDHGA12  | cluster d   |
| 53  | NM_018918    | 56110     | PCDHGA5   | cluster d   |
| 54  | NM_018920    | 56108     | PCDHGA7   | cluster d   |
| 55  | NM_018924    | 56102     | PCDHGB3   | cluster d   |
| 56  | NM_018926    | 56100     | PCDHGB6   | cluster d   |
| 57  | NM_018927    | 56099     | PCDHGB7   | cluster d   |
| 58  | NM_032101    | 56099     | PCDHGB7   | cluster d   |
| 59  | NM_001100391 | 138046    | RALYL     | cluster d   |
| 60  | NM_001206671 | 79608     | RIC3      | cluster d   |
| 61  | NM_032291    | 84251     | SGIP1     | cluster d   |
| 62  | NM_052910    | 114798    | SLITRK1   | cluster d   |
| 63  | NM_014926    | 22865     | SLITRK3   | cluster d   |
| 64  | NM_001145102 | 4088      | SMAD3     | cluster d   |
| 65  | NM_018967    | 54212     | SNTG1     | cluster d   |
| 66  | NM_015879    | 51046     | ST8SIA3   | cluster d   |
| 67  | NM_001059    | 6870      | TACR3     | cluster d   |
| 68  | NM_080872    | 137970    | UNC5D     | cluster d   |
| 69  | NM_199424    | 11060     | WWP2      | cluster d   |
| 70  | NM_032153    | 84107     | ZIC4      | cluster d   |
| 71  | NM_003451    | 7730      | ZNF177    | cluster d   |
| 72  | NM_001172832 | 91975     | ZNF300    | cluster d   |
| 73  | NM_018102    | 55713     | ZNF334    | cluster d   |
| 74  | NM_052852    | 90649     | ZNF486    | cluster d   |
| 75  | NM_001134442 | 91392     | ZNF502    | cluster d   |
| 76  | NM_182609    | 342926    | ZNF677    | cluster d   |
| 77  | NM_020063    | 343472    | BARHL2    | cluster a   |
| 78  | NM_170731    | 627       | BDNF      | cluster a   |
| 79  | NM_152414    | 27319     | BHLHE22   | cluster a   |
| 80  | NM_153038    | 151278    | CCDC140   | cluster a   |
| 81  | NM_020180    | 56853     | CELF4     | cluster a   |
| 82  | NM_001010852 | 134829    | CLVS2     | cluster a   |
| 83  | NM_014141    | 26047     | CNTNAP2   | cluster a   |
| 84  | NM_021110    | 7373      | COL14A1   | cluster a   |
| 85  | NM_019609    | 56265     | CPXM1     | cluster a   |
| 86  | NM_004746    | 9229      | DLGAP1    | cluster a   |
| 87  | NM_018008    | 55079     | FEZF2     | cluster a   |
| 88  | NM_021911    | 2561      | GABRB2    | cluster a   |
| 89  | NM_052917    | 114805    | GALNT13   | cluster a   |
| 90  | NM_001034845 | 442117    | GALNTL6   | cluster a   |
| 91  | NM_001480    | 2587      | GALR1     | cluster a   |
| 92  | NM_145793    | 2674      | GFRA1     | cluster a   |
| 93  | NM_000830    | 2897      | GRIK1     | cluster a   |
| 94  | NM_000831    | 2899      | GRIK3     | cluster a   |
| 95  | NM_133445    | 116443    | GRIN3A    | cluster a   |
| 96  | NM_021973    | 9464      | HAND2     | cluster a   |
| 97  | NM_002148    | 3236      | HOXD10    | cluster a   |
| 98  | NM_006043    | 9956      | HS3ST2    | cluster a   |
| 99  | NM_000524    | 3350      | HTR1A     | cluster a   |
| 100 | NM_001277285 | 22997     | IGSF9B    | cluster a   |

**SupplementaryTable S5: List of 180 hypermethylated genes in four clusters. (Con't)**

| NO. | RefSeq       | ENTREZ_ID | Gene Name | NMF cluster |
|-----|--------------|-----------|-----------|-------------|
| 101 | NM_024337    | 79192     | IRX1      | cluster a   |
| 102 | NM_002202    | 3670      | ISL1      | cluster a   |
| 103 | NM_001160132 | 56479     | KCNQ5     | cluster a   |
| 104 | NM_022363    | 64211     | LHX5      | cluster a   |
| 105 | NM_173576    | 283078    | MKX       | cluster a   |
| 106 | NM_004540    | 4685      | NCAM2     | cluster a   |
| 107 | NM_177400    | 84504     | NKX6-2    | cluster a   |
| 108 | NM_000905    | 4852      | NPY       | cluster a   |
| 109 | NM_003269    | 7101      | NR2E1     | cluster a   |
| 110 | NM_007226    | 11249     | NXPH2     | cluster a   |
| 111 | NM_005806    | 10215     | OLIG2     | cluster a   |
| 112 | NM_181459    | 5077      | PAX3      | cluster a   |
| 113 | NM_001127612 | 5080      | PAX6      | cluster a   |
| 114 | NM_002590    | 5100      | PCDH8     | cluster a   |
| 115 | NM_001037341 | 5142      | PDE4B     | cluster a   |
| 116 | NM_002600    | 5142      | PDE4B     | cluster a   |
| 117 | NM_004575    | 5458      | POU4F2    | cluster a   |
| 118 | NM_024504    | 63978     | PRDM14    | cluster a   |
| 119 | NM_001199764 | 5798      | PTPRN     | cluster a   |
| 120 | NM_007050    | 11122     | PTPRT     | cluster a   |
| 121 | NM_012293    | 7837      | PXDN      | cluster a   |
| 122 | NM_013435    | 30062     | RAX       | cluster a   |
| 123 | NM_001282863 | 340419    | RSPO2     | cluster a   |
| 124 | NM_001035    | 6262      | RYR2      | cluster a   |
| 125 | NM_015265    | 23314     | SATB2     | cluster a   |
| 126 | NM_005068    | 6492      | SIM1      | cluster a   |
| 127 | NM_001044    | 6531      | SLC6A3    | cluster a   |
| 128 | NM_003108    | 6664      | SOX11     | cluster a   |
| 129 | NM_001049    | 6751      | SSTR1     | cluster a   |
| 130 | NM_013305    | 29906     | ST8SIA5   | cluster a   |
| 131 | NM_001270484 | 6862      | T         | cluster a   |
| 132 | NM_001166220 | 57057     | TBX20     | cluster a   |
| 133 | NM_001256272 | 30813     | VSX1      | cluster a   |
| 134 | NM_022479    | 64409     | WBSCR17   | cluster a   |
| 135 | NM_003433    | 7691      | ZNF132    | cluster a   |
| 136 | NM_139056    | 170690    | ADAMTS16  | cluster b   |
| 137 | NM_018702    | 105       | ADARB2    | cluster b   |
| 138 | NM_001115    | 114       | ADCY8     | cluster b   |
| 139 | NM_001099733 | 116       | ADCYAP1   | cluster b   |
| 140 | NM_001117    | 116       | ADCYAP1   | cluster b   |
| 141 | NM_000680    | 148       | ADRA1A    | cluster b   |
| 142 | NM_019043    | 54518     | APBB1IP   | cluster b   |
| 143 | NM_173800    | 206338    | AQPEP     | cluster b   |
| 144 | NM_001145194 | 642597    | C18orf42  | cluster b   |
| 145 | NM_001082533 | 56934     | CA10      | cluster b   |
| 146 | NM_003716    | 8618      | CADPS     | cluster b   |
| 147 | NM_080617    | 140689    | CBLN4     | cluster b   |
| 148 | NM_001220490 | 1012      | CDH13     | cluster b   |
| 149 | NM_004361    | 1005      | CDH7      | cluster b   |
| 150 | NM_001796    | 1006      | CDH8      | cluster b   |

**SupplementaryTable S5: List of 180 hypermethylated genes in four clusters. (Con't)**

| NO. | RefSeq       | ENTREZ_ID | Gene Name | NMF cluster |
|-----|--------------|-----------|-----------|-------------|
| 151 | NM_020986    | 1103      | CHAT      | cluster b   |
| 152 | NM_175607    | 152330    | CNTN4     | cluster b   |
| 153 | NM_130773    | 129684    | CNTNAP5   | cluster b   |
| 154 | NM_000104    | 1545      | CYP1B1    | cluster b   |
| 155 | NM_005215    | 1630      | DCC       | cluster b   |
| 156 | NM_001039350 | 1804      | DPP6      | cluster b   |
| 157 | NM_001277174 | 10278     | EFS       | cluster b   |
| 158 | NM_001171195 | 1993      | ELAVL2    | cluster b   |
| 159 | NM_000129    | 2162      | F13A1     | cluster b   |
| 160 | NM_207426    | 399823    | FOXI2     | cluster b   |
| 161 | NM_001204267 | 2557      | GABRA4    | cluster b   |
| 162 | NM_001134366 | 2572      | GAD2      | cluster b   |
| 163 | NM_000844    | 2917      | GRM7      | cluster b   |
| 164 | NM_000863    | 3351      | HTR1B     | cluster b   |
| 165 | NM_000217    | 3736      | KCNA1     | cluster b   |
| 166 | NM_002235    | 3742      | KCNA6     | cluster b   |
| 167 | NM_002239    | 3760      | KCNJ3     | cluster b   |
| 168 | NM_001011705 | 11061     | LECT1     | cluster b   |
| 169 | NM_001102659 | 200726    | LOC200726 | cluster b   |
| 170 | NM_006158    | 4747      | NEFL      | cluster b   |
| 171 | NM_001105541 | 4741      | NEFM      | cluster b   |
| 172 | NM_005382    | 4741      | NEFM      | cluster b   |
| 173 | NM_138966    | 81832     | NETO1     | cluster b   |
| 174 | NM_001136271 | 137814    | NKX2-6    | cluster b   |
| 175 | NM_000439    | 5122      | PCSK1     | cluster b   |
| 176 | NM_001177875 | 5122      | PCSK1     | cluster b   |
| 177 | NM_001135690 | 5179      | PENK      | cluster b   |
| 178 | NM_022068    | 63895     | PIEZO2    | cluster b   |
| 179 | NM_145040    | 112464    | PRKCDBP   | cluster b   |
| 180 | NM_004248    | 2834      | PRLHR     | cluster b   |
| 181 | NM_001142333 | 54715     | RBFOX1    | cluster b   |
| 182 | NM_144682    | 146857    | SLFN13    | cluster b   |
| 183 | NM_001287813 | 54212     | SNTG1     | cluster b   |
| 184 | NM_014978    | 22986     | SORCS3    | cluster b   |
| 185 | NM_030623    | 80309     | SPHKAP    | cluster b   |
| 186 | NM_001130003 | 132204    | SYNPR     | cluster b   |
| 187 | NM_000192    | 6910      | TBX5      | cluster b   |
| 188 | NM_181486    | 6910      | TBX5      | cluster b   |
| 189 | NM_174937    | 256536    | TCERG1L   | cluster b   |
| 190 | NM_001136103 | 92293     | TMEM132C  | cluster b   |
| 191 | NM_133448    | 121256    | TMEM132D  | cluster b   |
| 192 | NM_198570    | 375567    | VWC2      | cluster b   |
| 193 | NM_001168379 | 84107     | ZIC4      | cluster b   |
| 194 | NM_001010879 | 284307    | ZIK1      | cluster b   |
| 195 | NM_001134656 | 389114    | ZNF662    | cluster b   |
| 196 | NM_207404    | 389114    | ZNF662    | cluster b   |

NMF, nonnegative matrix factorization.

**Supplementary Table S6.** Summary of the methylation levels of four candidate genes in cervical scrapings from endometrial cancer and noncarcinoma samples.

|                | Normal |         |                  | Myoma |         |                  | EC |         |                  | <i>P</i>          |
|----------------|--------|---------|------------------|-------|---------|------------------|----|---------|------------------|-------------------|
|                | N      | Median  | Rang             | N     | Median  | Rang             | N  | Median  | Rang             |                   |
| <i>BHLHE22</i> | 55     | 1.72    | 0.04–33.31       | 40    | 3.64    | 0.25–182.62      | 49 | 121.74  | 1.77–13707.83    | <10 <sup>-4</sup> |
| <i>CDO1</i>    | 56     | 6.27    | 0.06–280.67      | 40    | 9.45    | 0.30–259.16      | 50 | 378.15  | 6.60–6529.30     | <10 <sup>-4</sup> |
| <i>CELF4</i>   | 49     | 3.86    | 0.31–154.63      | 40    | 8.09    | 0.05–53.73       | 50 | 81.87   | 9.11–3242.10     | <10 <sup>-4</sup> |
| <i>ZNF662</i>  | 56     | 3717.80 | 2199.12–13240.89 | 40    | 4649.05 | 2932.09–14539.73 | 50 | 8570.91 | 3164.39–29690.47 | <10 <sup>-4</sup> |

EC, endometrial cancer; *P* values were calculated using the Kruskal-Wallis test. N, case number of available testing data using quantitative methylation PCR (QMSP).
